# Supplementary material for: Solvometallurgical recovery of antimony from waste polyvinyl chloride plastic and co-extraction of organic additives
Source: Royal Society of Chemistry journal article supplement (doi:10.1039/d4ra07240e), 2025-01-01
Supplement: d4ra07240e1.pdf [file d4ra07240e1.pdf]

## **Solvometallurgical recovery of antimony from waste polyvinyl chloride plastic and co-extraction of organic additives**

Jeroen Spooren <sup>a,\*</sup>

a. Waste Recycling Technologies, Materials & Chemistry Unit, Flemish Institute for Technological Research, VITO N.V., Boeretang 200, B-2400 Mol, Belgium.

[jeroen.spooren@vito.be](mailto:jeroen.spooren@vito.be)

### ***Electronic supplementary information (ESI)***

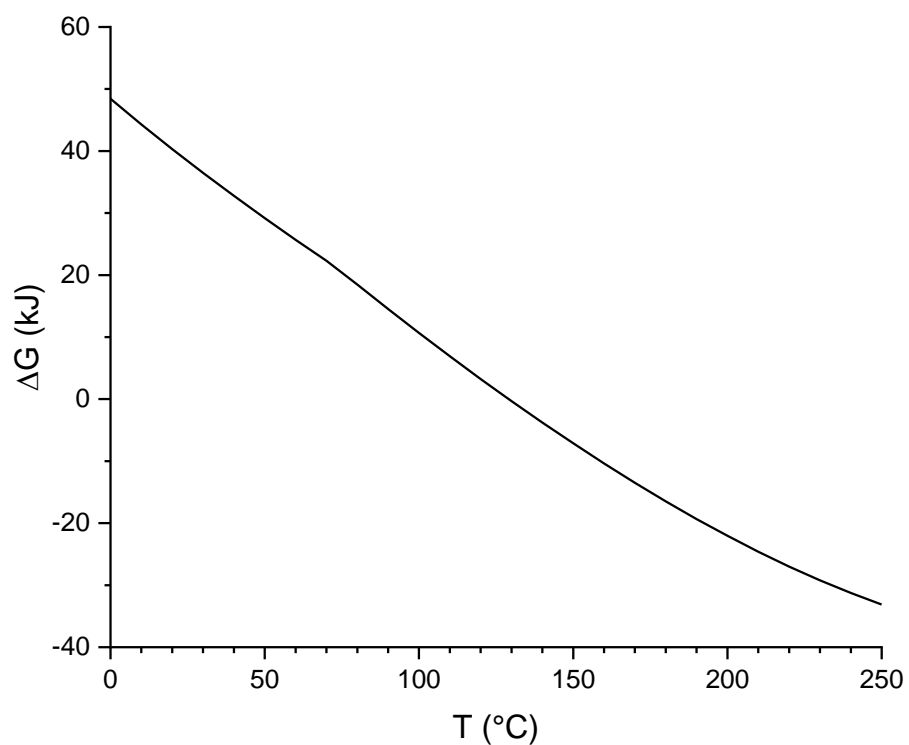

Figure S1 Gibbs free energy for the reaction  $\text{Sb}_2\text{O}_5 + 3\text{HCl} \rightarrow 2\text{SbCl}_3 + 3\text{H}_2\text{O}$ , as modelled by HSC Chemistry v8.0 software.

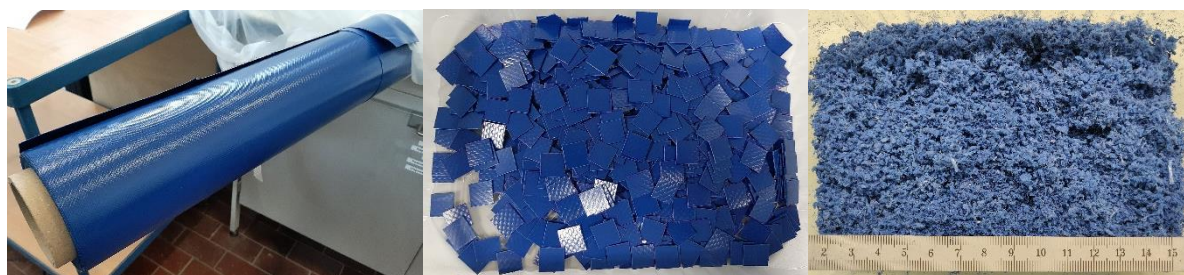

Figure S2 Photos of the PVC sample (left) as receive; (middle) cut in 1x1 cm flakes; (right) cryogenically milled to <4 mm.

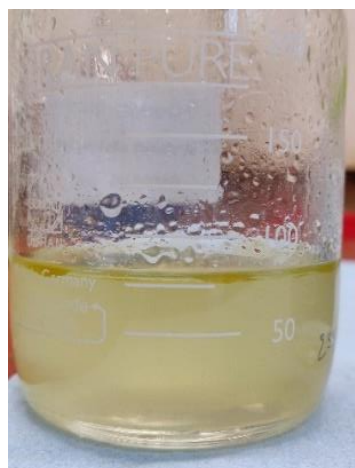

Figure S3 Photo of FR1 after ethanol removal by distillation.

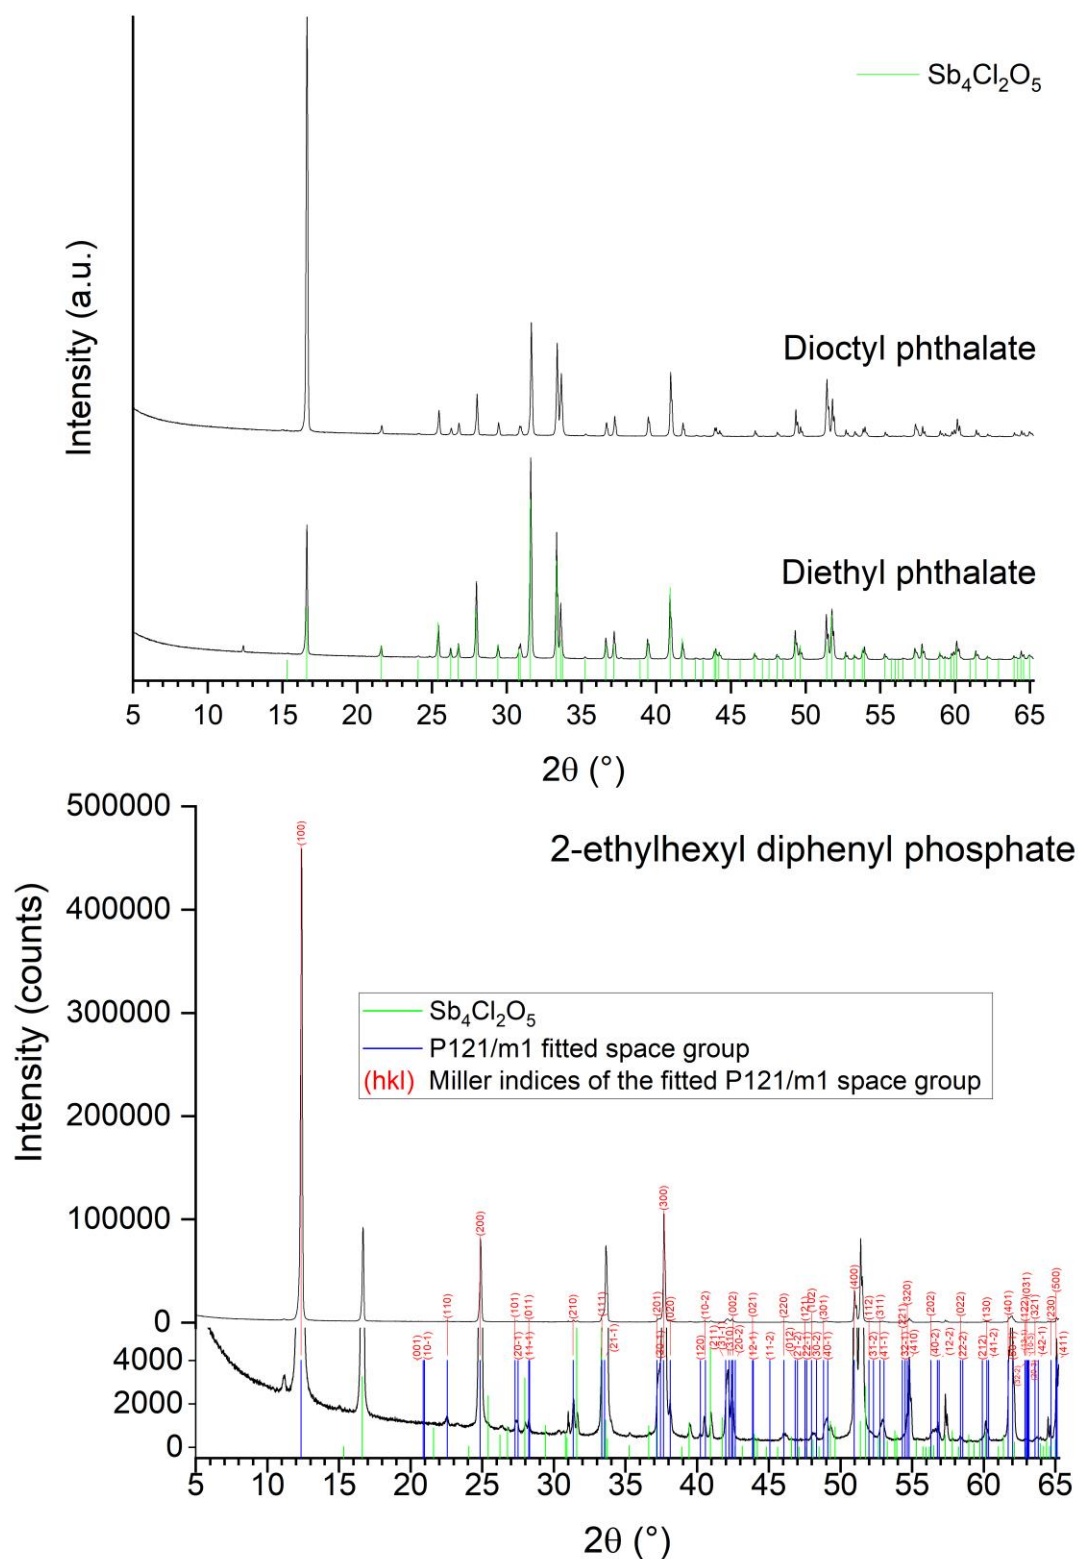

Figure S4 XRD diffractograms of the precipitates formed by hydrolysis precipitation of an acidic  $\text{SbCl}_3$  solution in the presence of (top) phthalates and (bottom) 2-ethylhexyl diphenyl phosphate. In the bottom graph the peak positions of a fitted space group (P121/m1,  $a = 8.691(4)$  Å,  $b = 5.477(3)$  Å,  $c = 5.160(3)$  Å,  $\beta = 106.856(8)^\circ$ ) are plotted, accompanied by their respective Miller indices.

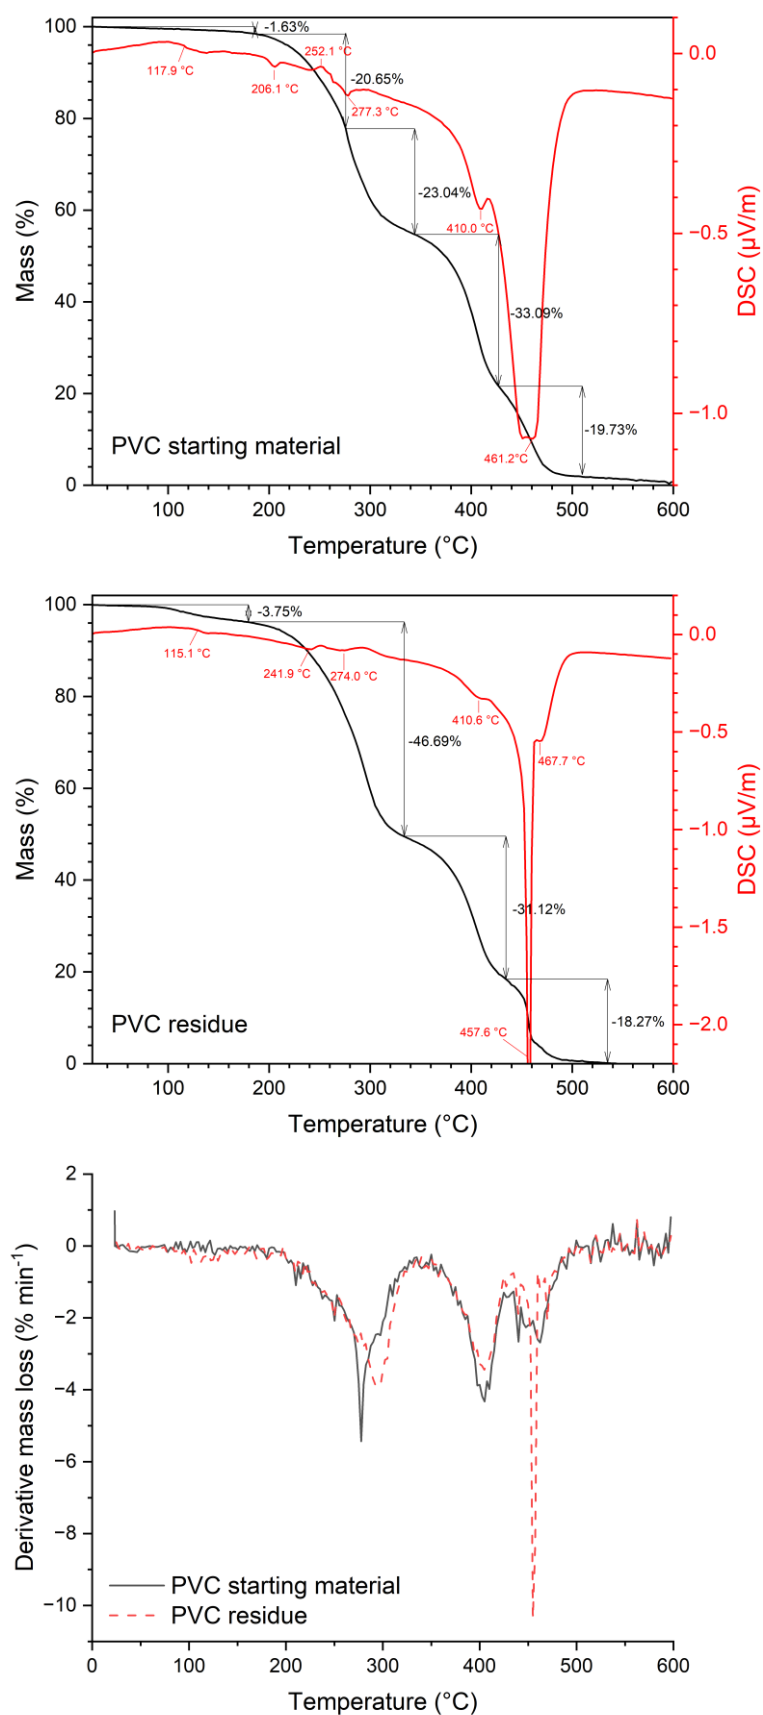

Figure S5 DSC and TGA curves of the original cryogenically milled PVC sample (top) and the residue obtained after leaching in 4 M ethanolic HCl solution at 80 °C for 4 h (bottom). The derivative mass loss of the two samples is shown in the graph at the bottom.

Table S1 Average pH of 2 M, 4 M and 6 M HCl aqueous and ethanolic solutions after leaching reactions at 50 °C and 80 °C. Standard deviations are given as error.

| [HCl] (M) | Average pH aqueous solution | Average pH ethanolic solution |
|-----------|-----------------------------|-------------------------------|
| 2         | -0.095 ± 0.149              | -0.422 ± 0.151                |
| 4         | -0.682 ± 0.108              | -1.029 ± 0.027                |
| 6         | -0.848 ± 0.288              | -1.272 ± 0.018                |
